# Supplementary figures and images for: A Monolayer System for the Efficient Generation of Motor Neuron Progenitors and Functional Motor Neurons from Human Pluripotent Stem Cells
Source: MDPI journal article supplement (doi:10.3390/cells10051127), 2021-05-07

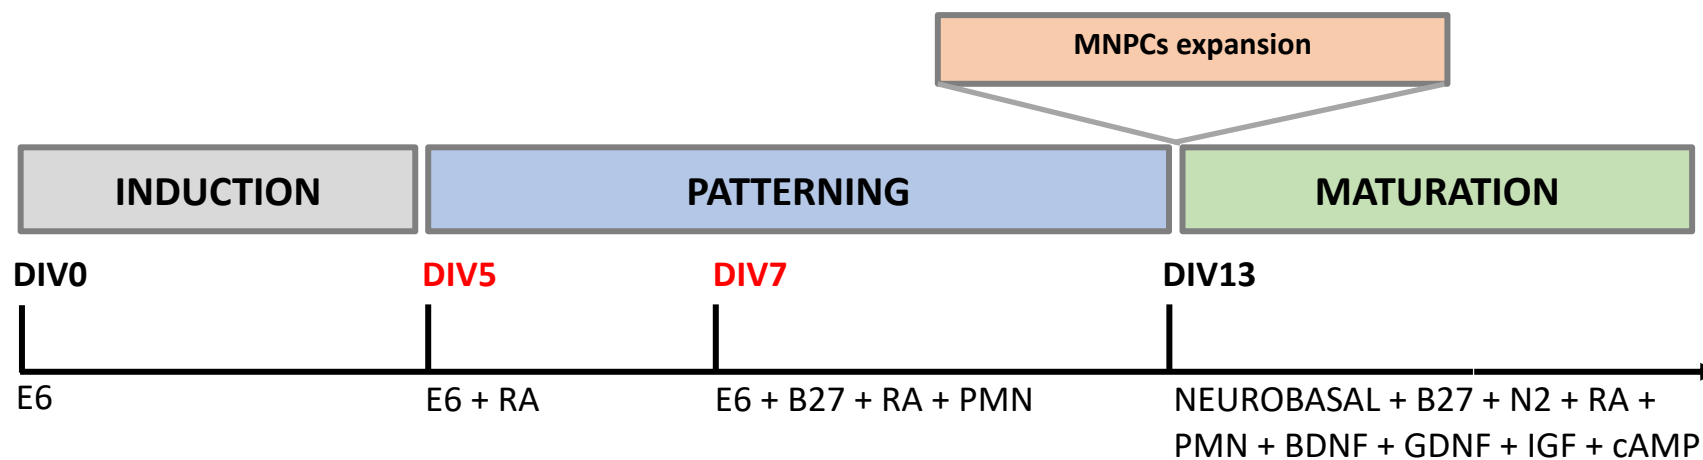

Figure S1.

**A**

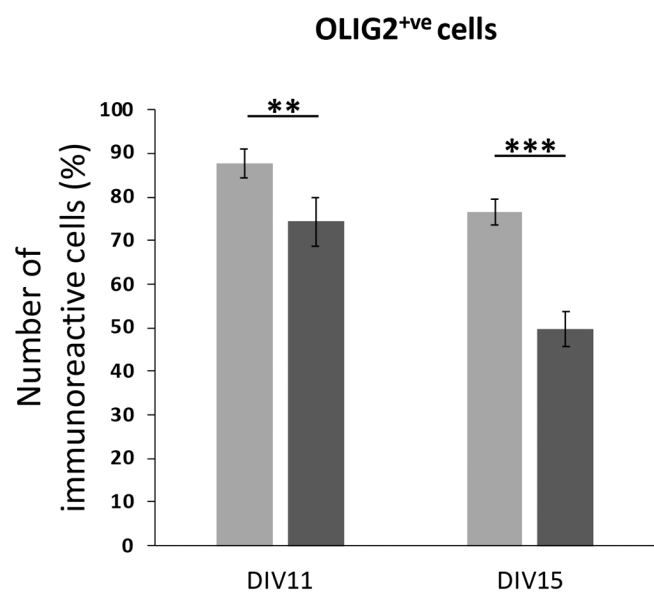

**B**

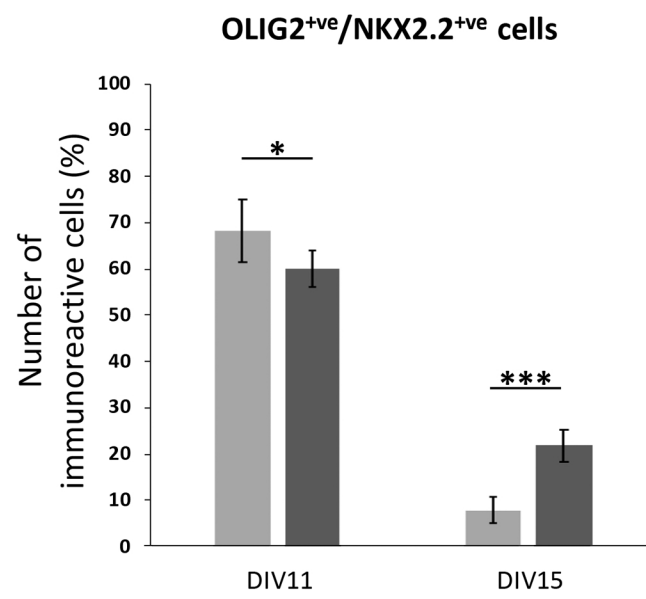

**C**

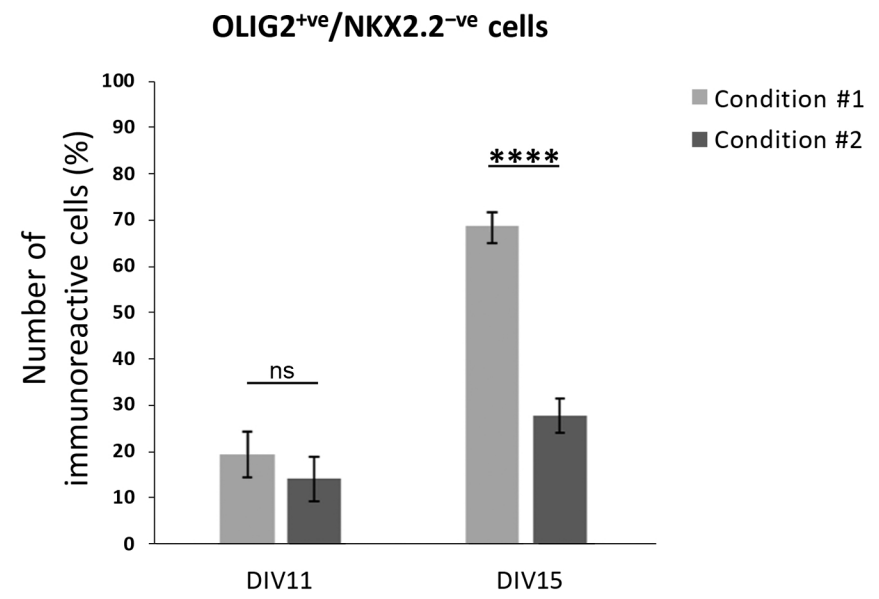

**Figure S2.**

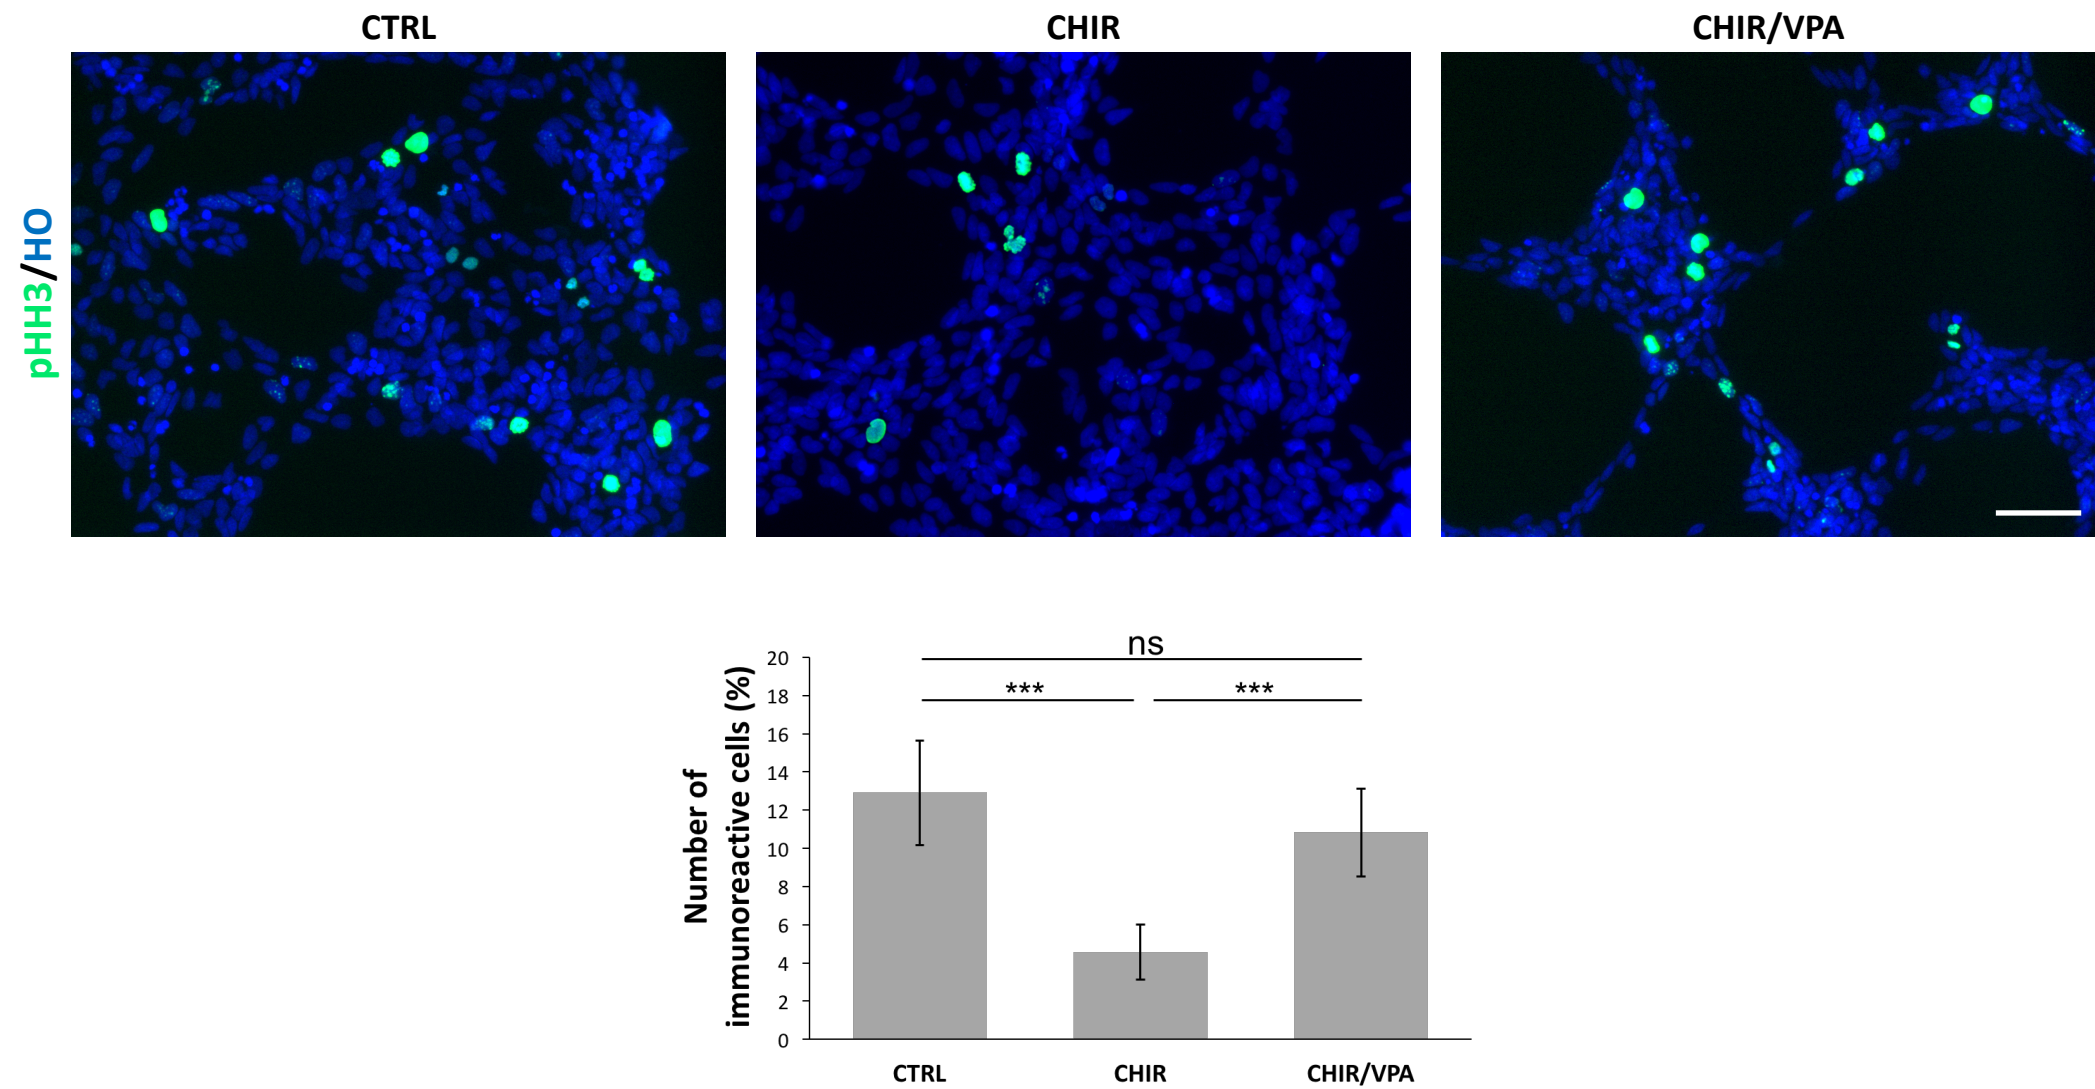

Figure S3.

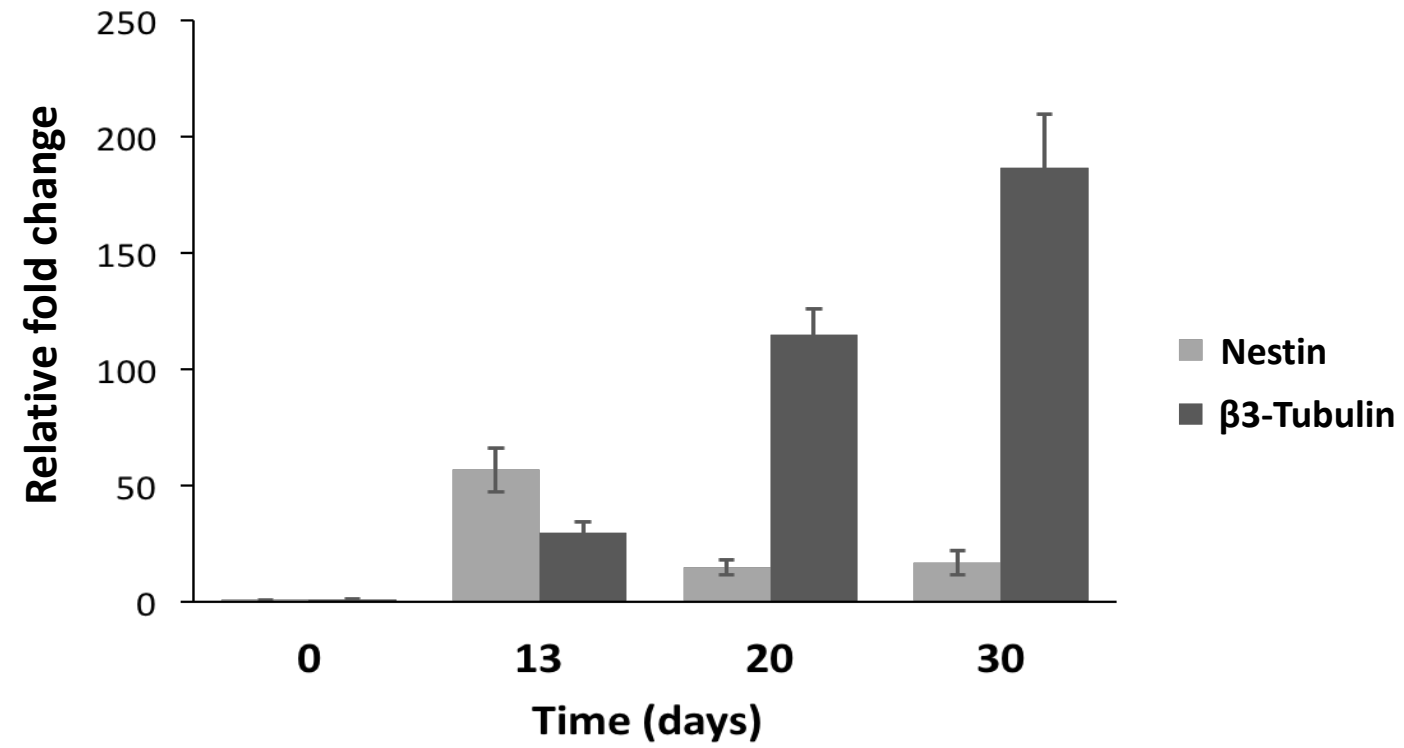

Figure S4.



**A**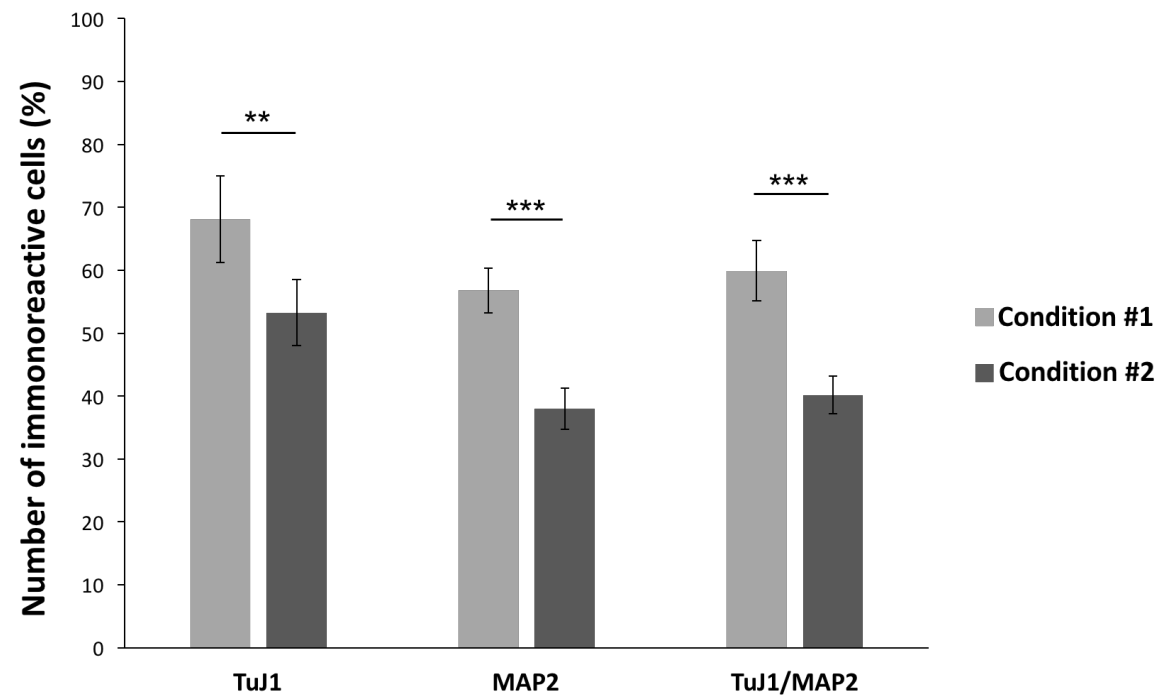**B**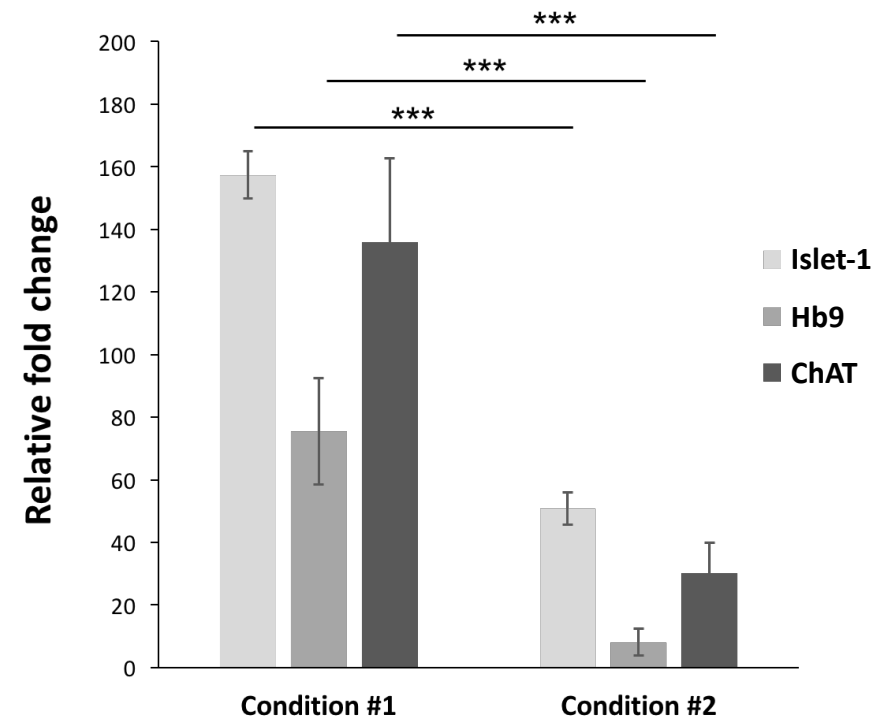

Figure S5.

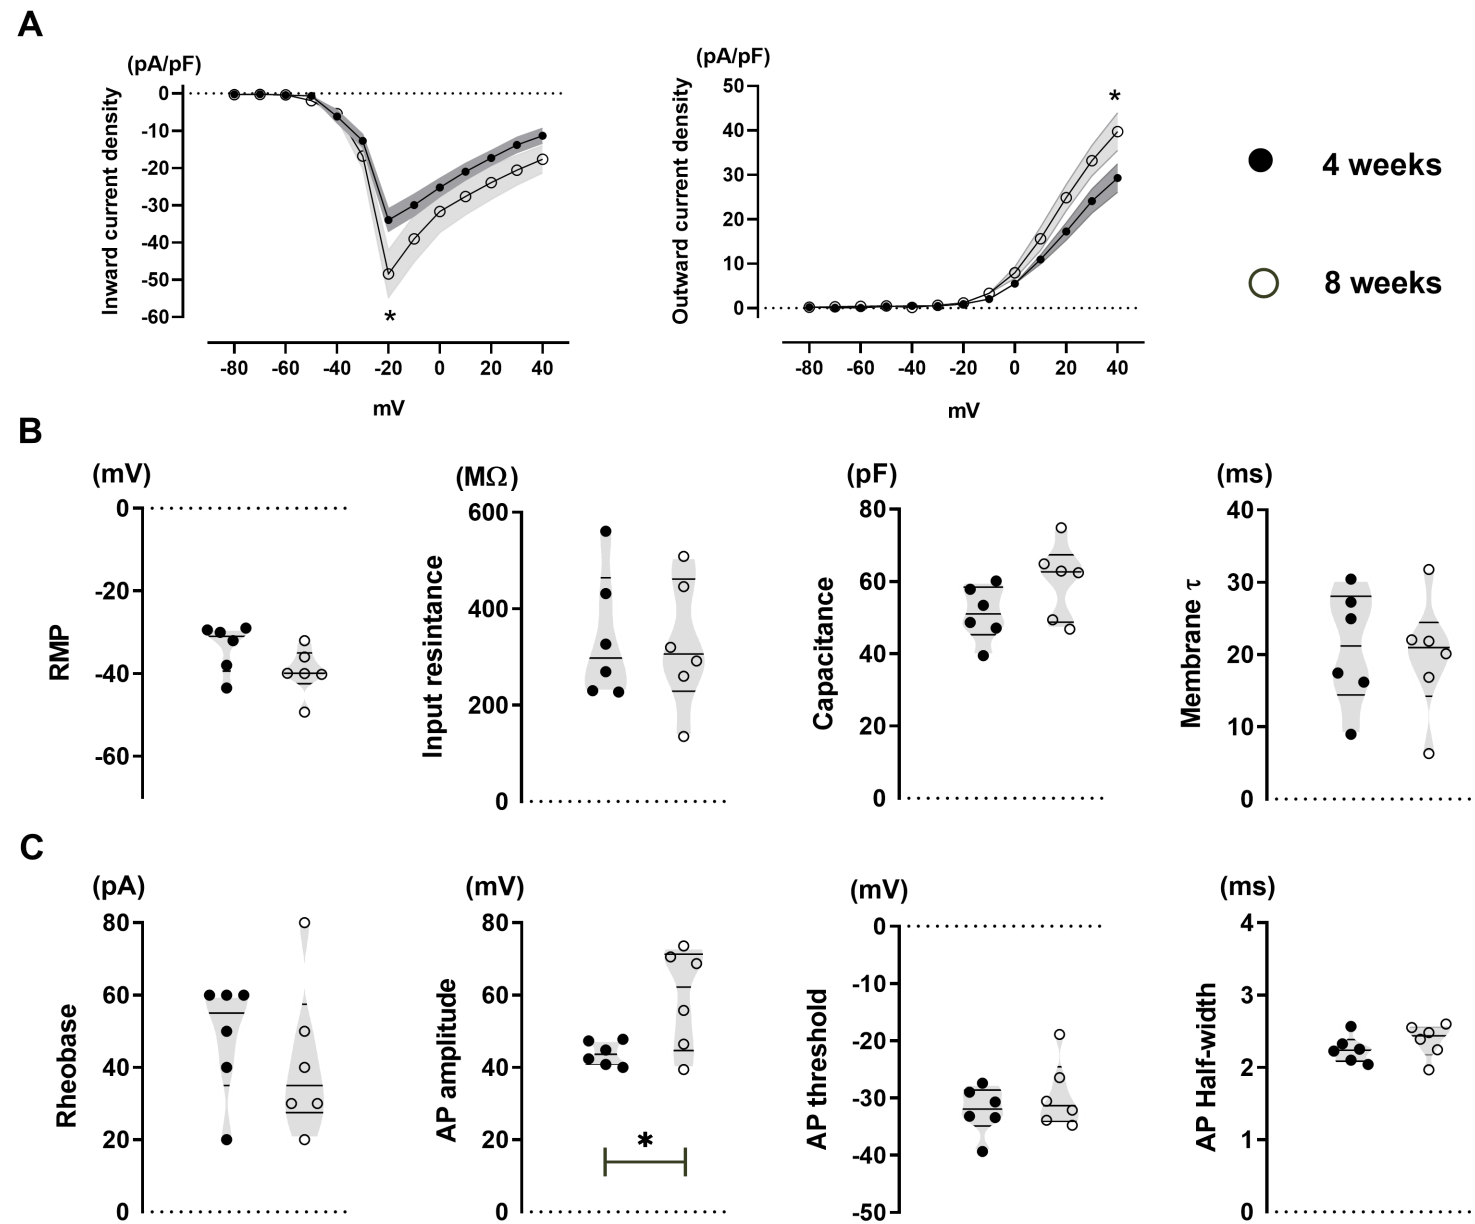

Figure S6.

Supplement: s1 [file s1]
